# Supplementary material for: Ribosome clearance during RNA interference
Source: PubMed Central journal article supplement — RNA. 2019 Aug;25(8):963–74. doi: 10.1261/rna.070813.119 (PMC6633202; doi:10.1261/rna.070813.119), 2019-08

**A**

Early L4

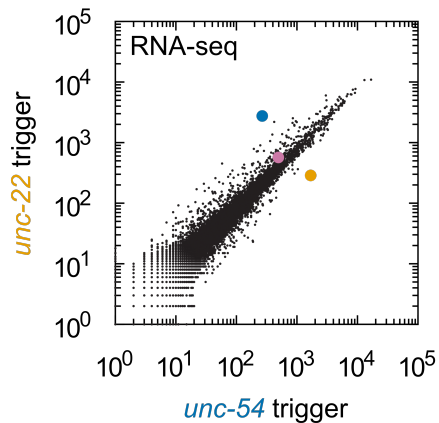Mid L4  
(+4 hours)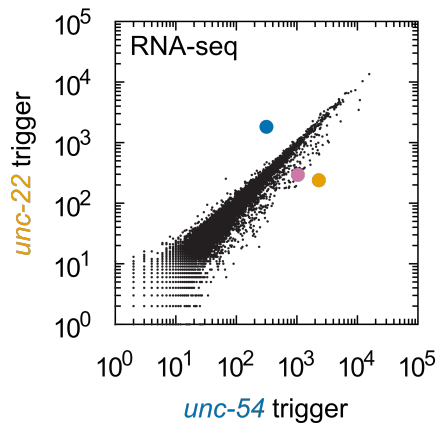Late L4  
(+8 hours)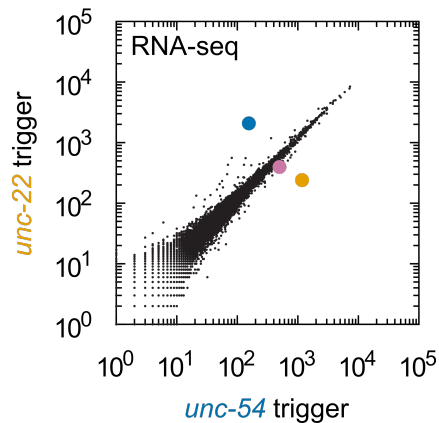Young Adult  
(+12 hours)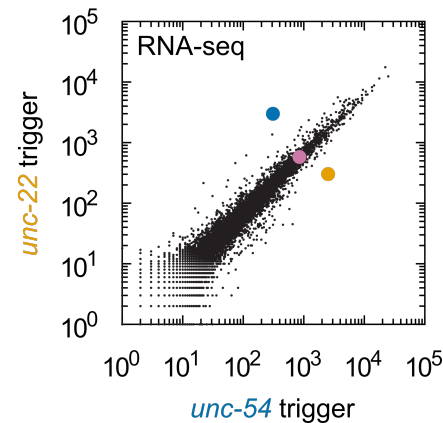**B**

Early L4

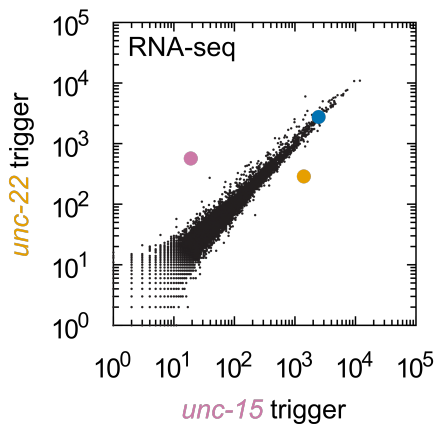Mid L4  
(+4 hours)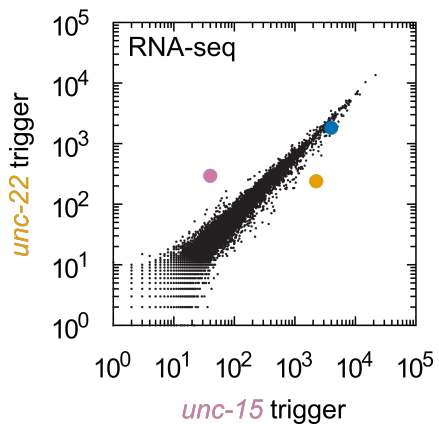Late L4  
(+8 hours)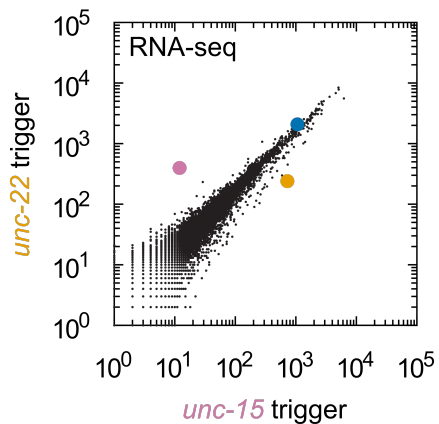Young Adult  
(+12 hours)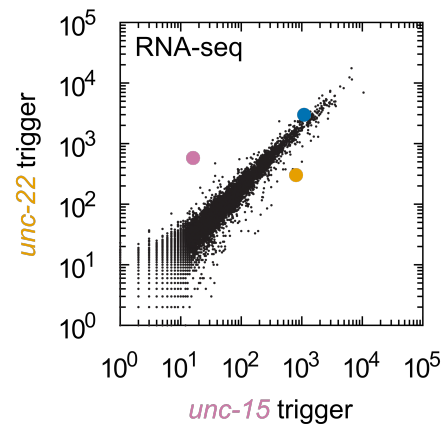

Supplement: supp_070813.119_Supplemental_Fig_S1.pdf [file supp_070813.119_Supplemental_Fig_S1.pdf]
