# Supplementary material for: Ribosome clearance during RNA interference
Source: PubMed Central journal article supplement — RNA. 2019 Aug;25(8):963–74. doi: 10.1261/rna.070813.119 (PMC6633202; doi:10.1261/rna.070813.119), 2019-08
Supplement: supp_070813.119_Supplemental_Fig_S4.pdf [file supp_070813.119_Supplemental_Fig_S4.pdf]

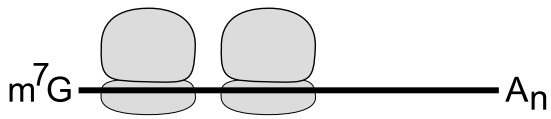

↓  
Transcript  
targeted by  
RISC

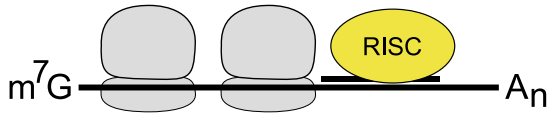

↓  
Transcript cleaved,  
ribosome elongates  
to 3' edge

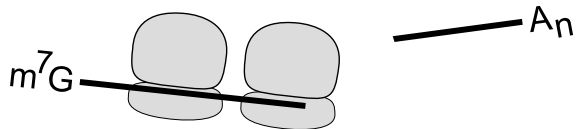

↓  
Stalled ribosomes  
form a "traffic jam"

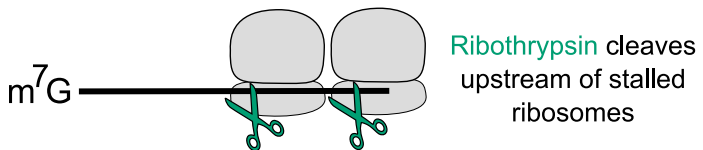

mRNA degraded  
by *SKI*/exosome

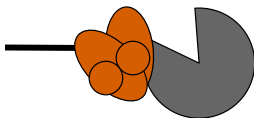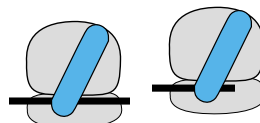

Ribosomes  
rescued by *PELO*
