# Supplementary figures and images for: Ribosome clearance during RNA interference
Source: PubMed Central journal article supplement — RNA. 2019 Aug;25(8):963–74. doi: 10.1261/rna.070813.119 (PMC6633202; doi:10.1261/rna.070813.119), 2019-08

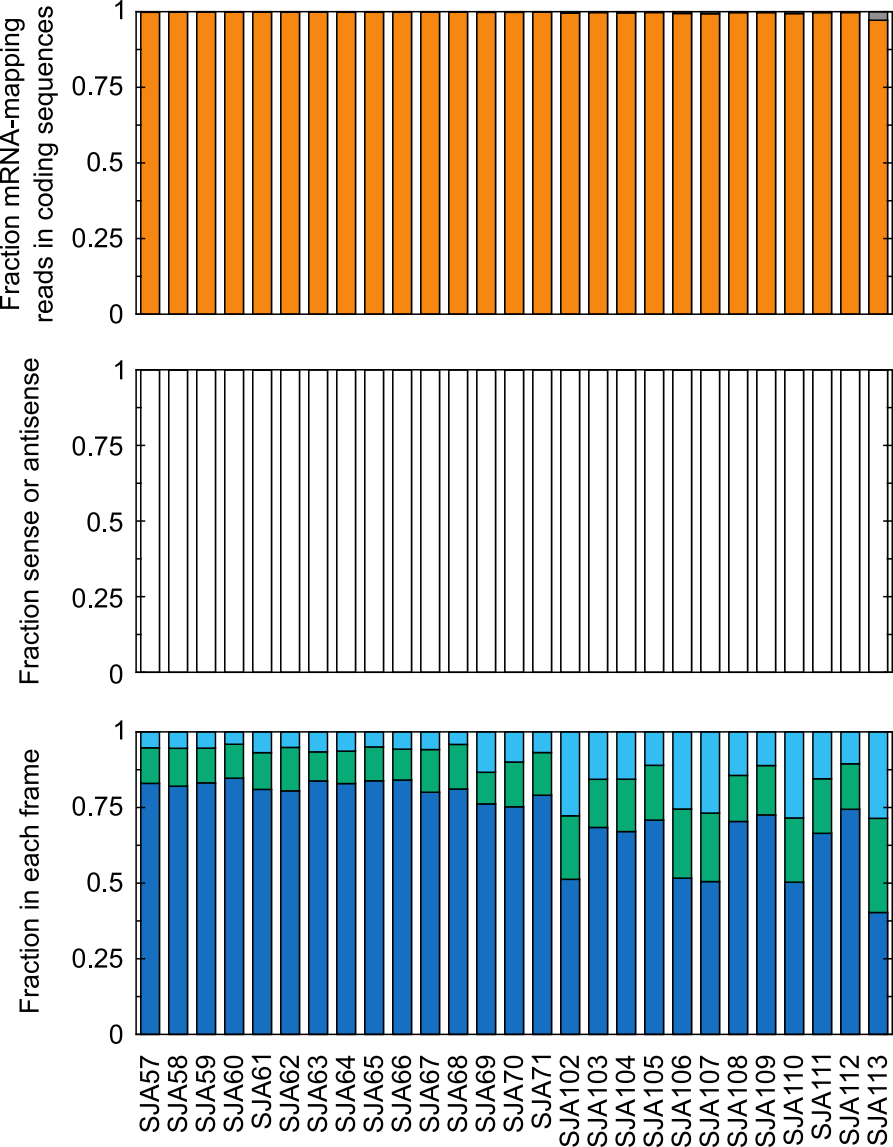

Supplement: supp_070813.119_Supplemental_Fig_S9.pdf [file supp_070813.119_Supplemental_Fig_S9.pdf]
